# Supplementary material for: Selective synthesis, polymorphism, reversible phase transition and structure-dependent optical functionalities of gadolinium oxyfluorides
Source: Royal Society of Chemistry journal article supplement (doi:10.1039/c8tc03472a), 2018-01-01
Supplement: c8tc03472a1.pdf [file c8tc03472a1.pdf]

**Supporting Information for:**

**Selective Synthesis, Polymorphism, Reversible Phase  
Transition and Structure-Dependent Optical Functionalities of  
Gadolinium Oxyfluorides**

Ting Wen,<sup>a,b,c\*</sup> Xueyan Li,<sup>a</sup> Depeng Ning,<sup>a</sup> Jinchen Yao,<sup>a</sup> Baocheng Yang<sup>a,b\*</sup> and Yonggang Wang<sup>c\*</sup>

<sup>a</sup> Institute of Nanostructured Functional Materials, Huanghe Science and Technology  
College, Zhengzhou, Henan, 450006, China;

<sup>b</sup> Henan Provincial Key Laboratory of Nano-composite materials and Applications,  
Zhengzhou, Henan, 450006, China.

<sup>c</sup> Center for High Pressure Science and Technology Advanced Research (HPSTAR),  
Beijing 100094, China

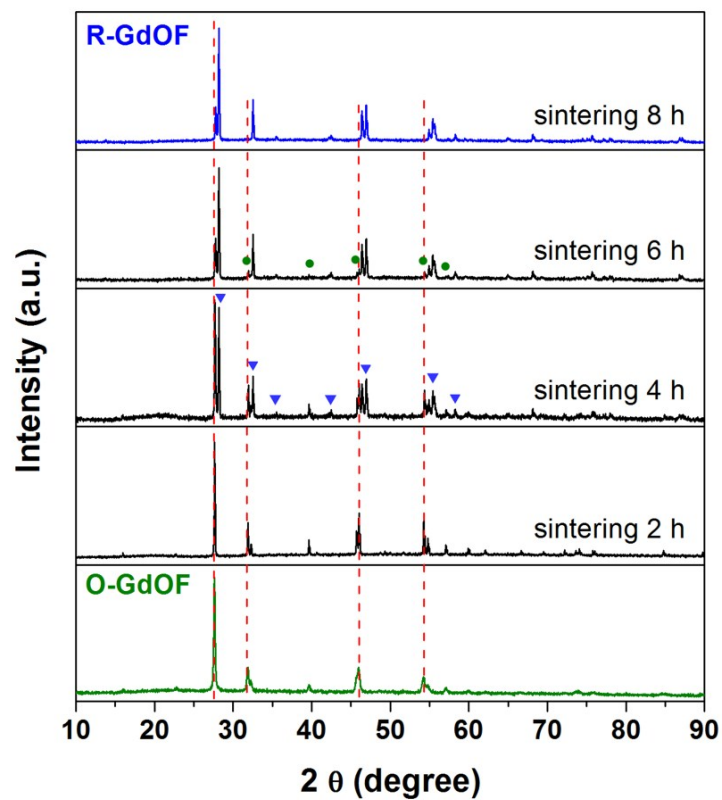

**Figure S1.** Ex situ powder XRD patterns of O-GdOF show its transformation to R-GdOF at 700 °C with different sintering time.

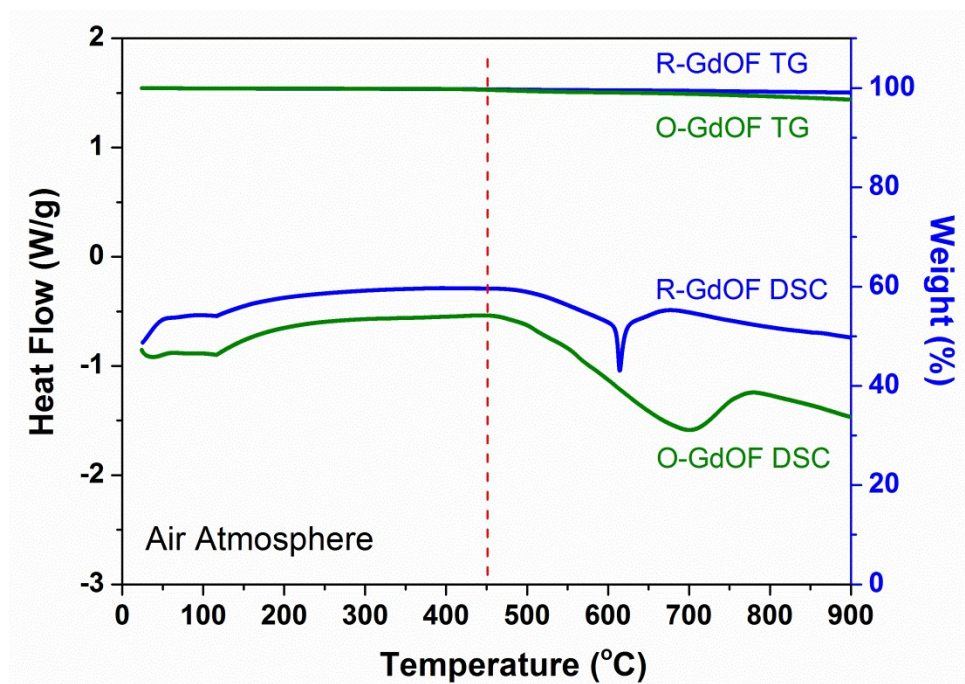

**Figure S2.** DSC and TG analysis of R- and O-GdOF samples in air.

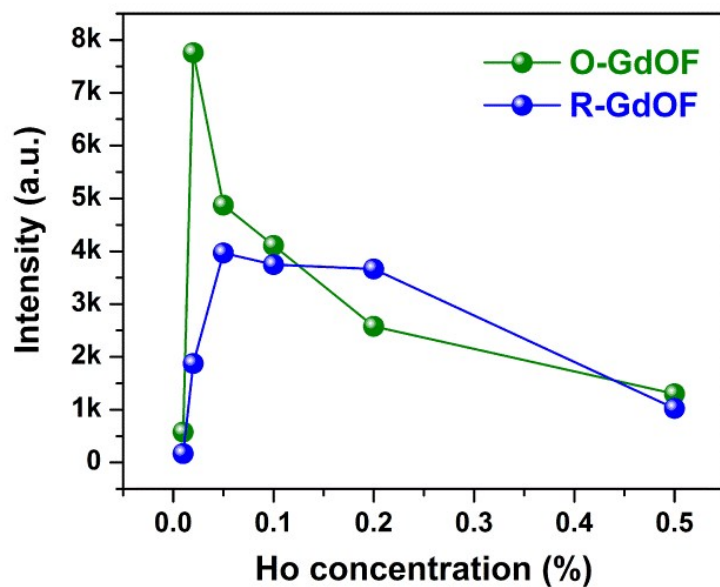

**Figure S3.** The net area of band at 670 nm of O- and R-GdOF against  $\text{Ho}^{3+}$  doping concentration.

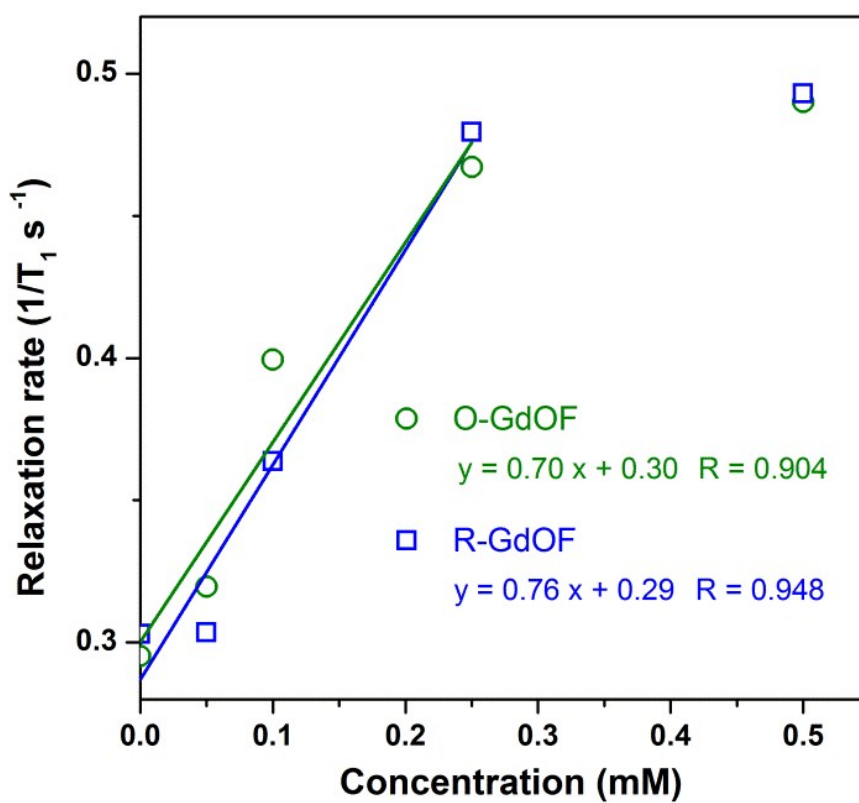

**Figure S4.** Plot of relaxation rate ( $1/T_1$ ) versus different Gd concentrations of O- and R-GdOF samples. (O-GdOF: Yb 20%, Er 0.2%; R-GdOF: Yb 20%, Er 0.1%)

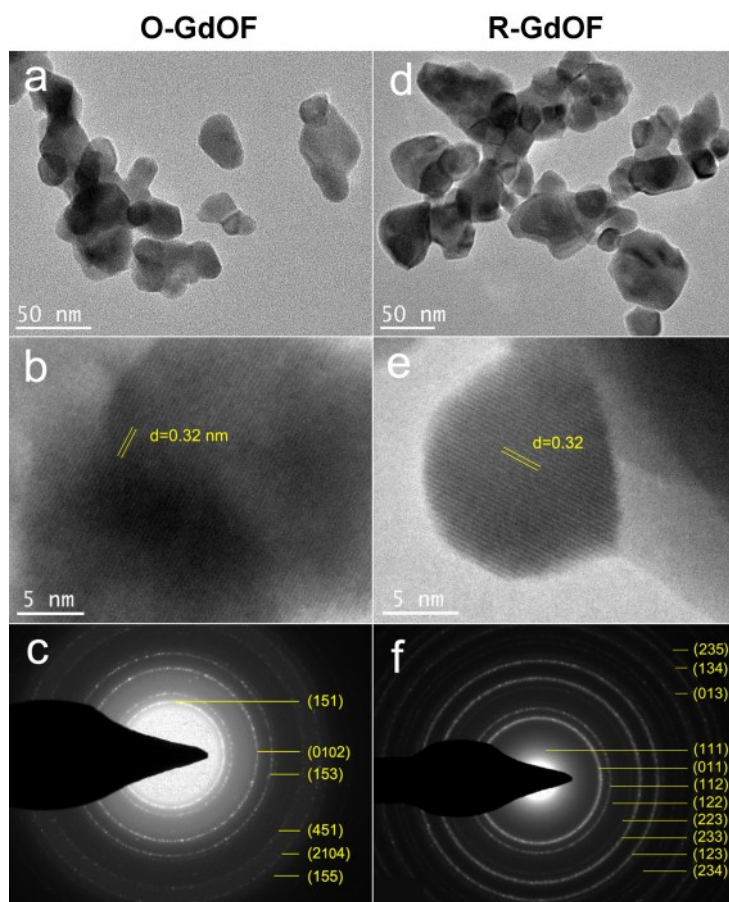

**Figure S5.** TEM, high-resolution TEM images and SAED patterns of O- and R-GdOF samples. The HRTEM images in (b), the lattice fringes of  $d = 0.32$  nm is consistent with the distance of 151 facets of O-GdOF, and (e) the lattice fringes of  $d = 0.32$  nm consists with the distance of 011 facets of R-GdOF.
